# Supplementary material for: Extending the models for iron and sulfur oxidation in the extreme Acidophile Acidithiobacillus ferrooxidans
Source: PubMed Central journal article supplement (PMC2754497; doi:10.1186/1471-2164-10-394), 2009-08-24
Supplement: 1471-2164-10-394-S2.pdf [file 1471-2164-10-394-S2.pdf]

sp|Q16795|NDUA9\_HUMAN MAAAQSRVVRVLSMSRSAITAIATSVCCHGPPCRQLHHALMPHGKGRSS 50  
sp|Q5R5S0|NDUA9\_PONPY MAAAQSRVVRVLSMSRSAITAIATSVCCHGPPRRQLHHALIPHGKGRSS 50  
sp|P34943|NDUA9\_BOVIN MAAAVHPRVVRVLPMSRSVVALAASVFHSPQRQLHHAVIPHGKGRSS 50  
sp|Q9DC69|NDUA9\_MOUSE MAAAVRFRVVRALPMSRPAITAAATSVCSSHRQLHHAVIPHGKGRSS 50  
sp|P25284|NDUA9\_NEUCR -MAPLTAAMRSTPRIIVSNAFGFQRRATSDVTITRTGKPIIRN-QGGRSS 48  
sdrA1 -----MYAVYPEVLMNNYVPV-----DGL 19  
sdrA2 -----VSAMTENDYTKAK-----GDGI 17

sp|Q16795|NDUA9\_HUMAN VSGIVATVFGATGFLGRYVNVNHLGRMGSQVIIPYRCDKYDIMHLRPMGDL 100  
sp|Q5R5S0|NDUA9\_PONPY VSGIVATVFGATGFLGRYVNVNHLGRMGSQVIIPYRCDTYDIMHLRPMGDL 100  
sp|P34943|NDUA9\_BOVIN VSGIVATVFGATGFLGRYVNVNHLGRMGSQVIVPHRCEPYDTMHLRPMGDL 100  
sp|Q9DC69|NDUA9\_MOUSE VSGVATVFGATGFLGRYVNVNHLGRMGSQVIIPYRCDVYDIMHLRPMGDL 100  
sp|P25284|NDUA9\_NEUCR LGGHTATVFGATGQLGRYIVNRLARQGGCTVVIIPFR-DEYNKRHLKVTGDL 97  
sdrA1 LNGRVIIIVTGAGEGIGRCAAVEFARLGAEVVLLGRTQRKLEGVYDEIVDS 69  
sdrA2 LDGKTIIVTGAGDGI GRAVAIEYAHQGATVVLLGKTKRNLEGVYDEITDY 67  
:. \* . \* \*\* : \*\* . . : \* . \* : : \*

sp|Q16795|NDUA9\_HUMAN GQLLFLEWDARDKDSIRRVVQHSNVVINLIGRDWETKNDFDFEDVFKIPQ 150  
sp|Q5R5S0|NDUA9\_PONPY GQLLFLEWDARDKDSIRRVVQHSNVVINLIGRDWETRNDFDFEDVFKIPQ 150  
sp|P34943|NDUA9\_BOVIN GQIFMDWNGRDKDSIRRAVEHSSVIVNLVGREWETQNFDFEDVFKIPQ 150  
sp|Q9DC69|NDUA9\_MOUSE GQLTFLEWDARDKDSIRKAVQHSNVVINLIGREWETRNDFDFEDVFNIPR 150  
sp|P25284|NDUA9\_NEUCR GKVVMIIEFDLRNTQSIEESVRHSDVVYNLIGRDYPTKNFSFEDVHIEGAE 147  
sdrA1 G-----YKEPVIHPMDLLTAKGRDYQDFAQRLKESLGRLDG 105  
sdrA2 G-----YAEPAIVVLDLADPASDAFKTIGAAISSEFTQLNG 103  
\* . . : . : : . .

sp|Q16795|NDUA9\_HUMAN AIAQLSKEAGVEKFIHVSHLNANIKSSSRYLNRNKAVGEKVVVRDAFPEAII 200  
sp|Q5R5S0|NDUA9\_PONPY AIAQLSKEAGVEKFIHVSHLNANIKSSSRYLNRNKAVGEKVVVRDAFPEAII 200  
sp|P34943|NDUA9\_BOVIN AIAQVSKEAGVEKFIHISHLNADIKSSSKYLRSKAVGEKEVRETFPEAII 200  
sp|Q9DC69|NDUA9\_MOUSE AIAQASKEAGVERFIHVSHLNAMKSSSKLRSKAVGEKEVRSVFPPEAII 200  
sp|P25284|NDUA9\_NEUCR RIAEAVAKYDVDRFIHVSSYNADPNSECEFFATKARGEQVVRISFPETTI 197  
sdrA1 ILHN---AAELDILTPIQYDEELWESAMKVVNTAP-YLLTQACLPLLLA 151  
sdrA2 IVHN---AAELGLMTPLENYEGALWDHVFQVNVKSP-LLVTQQCLPLLKE 149  
: : : : : . . . : : : \*

sp|Q16795|NDUA9\_HUMAN VKPSDIFGREDRFLNSFASMHFRGPIPLGSLGWKTVKQPVYVVDVSKGIV 250  
sp|Q5R5S0|NDUA9\_PONPY IKPSDIFGREDRFLNSFASMHFRGPTPLGSLGWKTVKQPVYVVDVSKGIV 250  
sp|P34943|NDUA9\_BOVIN IKPAEIFGREDRFLNYFANIRWFGGVPPLISLGGKTVKQPVYIVDVTKGII 250  
sp|Q9DC69|NDUA9\_MOUSE IRPSDIFGREDRFLNHFANYRWFVAVPLVSLGFKTVKQPVYVADVSKGIV 250  
sp|P25284|NDUA9\_NEUCR VRPAPMFGFEDRLLHLKASVKN---ILTSNGMQEKYNPVHVIDVQALE 243  
sdrA1 SEDASIVFITDDCAREAKYWGAVAVSRAAVQHLGLTLAIELQNTNVRVN 201  
sdrA2 APYASIIIFTTDESQVKKPKYWGAVGVSRAAILHMARMWAIEYANTPIRVN 199  
: : . \* . : : : : : . : : .

sp|Q16795|NDUA9\_HUMAN NAVKDPDANGKSFVFGPSRYLLFHLVKYIFAVAHRLFLPFPPLPFAYRW 300  
sp|Q5R5S0|NDUA9\_PONPY NAVKDPDANGKSFVFGPNRYLLFHLVKYIFAVAHRLFLPFPPLPFAYRW 300  
sp|P34943|NDUA9\_BOVIN NAIKDPDARGKTFVFGPSRYLLFDLVQYVFAVAHRPFLPYPLPHFAYRW 300  
sp|Q9DC69|NDUA9\_MOUSE NATKDPDAVGKTFVFGPNRYLLFHLVKYIFGMTHRTFIPYPLPFVYSW 300  
sp|P25284|NDUA9\_NEUCR QMLWDDNTASETFELYGPKTYTTAEISEMVDREIYKRRRHVNVPKKILKP 293  
sdrA1 VINPGPCRTG----MRVTRHPGASIMSVPPP IAIMPLYEYLLGPD SKNT 246  
sdrA2 IVDPGPCRTG----LRLLTHPGMPMKRYTPPEAITSIYTQLMDCDVLGH 244  
. . : :

sp|Q16795|NDUA9\_HUMAN VARVFEISPFEPWITRDKVERMHITDMKLPPLGLEDLGIQATPLELKAI 350  
sp|Q5R5S0|NDUA9\_PONPY VARVFEISPFEPWITRDKVERMHITDMKLPPLGLEDLGIQATPLELKAI 350  
sp|P34943|NDUA9\_BOVIN IGRLEISPFEPWITRDKVERIHITDKILPHLPGLLEDLGVQATPLELKAI 350  
sp|Q9DC69|NDUA9\_MOUSE IGKLFGLSPFEPWITRDKVERIHISDVMPDLPGLLEDLGVQATPLELKI 350  
sp|P25284|NDUA9\_NEUCR IAGVLNKAALWPPIMSADEIEREFHDQVIDPEAKTFKDLGIEPDIANFTY 343  
sdrA1 RGQIMNARDWLD AEHDDRQIVAVLEQ----- 272  
sdrA2 NGELFYAQNFINPDLDDRTEKDLATSTV----- 272  
. : : : \*

sp|Q16795|NDUA9\_HUMAN EVLRRHRT--YRWLSAEIEDVKPAKTVNI--- 377  
sp|Q5R5S0|NDUA9\_PONPY EVLRRHRT--YRWLSAEIEDVKPAKTVNI--- 377  
sp|P34943|NDUA9\_BOVIN EVLRRHRT--YRWLSSEIEDVQPAKTIPTSGP 380  
sp|Q9DC69|NDUA9\_MOUSE EVLRRHRT--YRWLSSEIEETKPAKTVNY--- 377  
sp|P25284|NDUA9\_NEUCR HYLQSYRSNAYYDLPPEATEKERREDREYIHML 375
