# Supplementary material for: Extending the models for iron and sulfur oxidation in the extreme Acidophile Acidithiobacillus ferrooxidans
Source: PubMed Central journal article supplement (PMC2754497; doi:10.1186/1471-2164-10-394), 2009-08-24
Supplement: 1471-2164-10-394-S3.pdf [file 1471-2164-10-394-S3.pdf]

| NCBI Genome ID NC011761                                          | Gene (locus)    | Forward primer (5'-3') | Reverse primer (5'-3') | Amplicon size |
|------------------------------------------------------------------|-----------------|------------------------|------------------------|---------------|
| <b><i>rus</i> operon</b>                                         |                 |                        |                        |               |
| AFE 3151                                                         | <i>cup</i>      | ATTGCGCATCAGTTCTCCAT   | GGCACCACAAAAGTGAAGGT   | 200           |
| AFE 3146                                                         | <i>rus</i>      | GATGGCCGGTACTCTGGATA   | ATCTCCAAGGTTCGGTTCTT   | 204           |
| <b>Cytochrome <i>c</i> oxidase complex biogenesis operon</b>     |                 |                        |                        |               |
| AFE 3141                                                         | <i>ctaR</i>     | TATGCCCTGCGGAGTCTAAT   | TATTTAGGGACTCGGCACCA   | 202           |
| <b>Sensor/regulator two component signal transduction system</b> |                 |                        |                        |               |
| AFE 3137                                                         | <i>regA</i>     | CGATTGAGGCCATAAAGCTC   | CAGCCGATATGTTGCCATTA   | 195           |
| <b><i>petI</i> operon</b>                                        |                 |                        |                        |               |
| AFE 3108                                                         | <i>sdrA1</i>    | GTTTGGGTGCTGAAGTAGTG   | GCAACAGTGGCAAACAGGC    | 318           |
| AFE 3109                                                         | <i>petA1</i>    | CCATTGAACCAGGTATGCAG   | ATCCCCGACATACCATTTCAGG | 202           |
| AFE 3110                                                         | <i>petB1</i>    | TTCCTTATTATTCTCGCAGCC  | AAACCCCGCAACAATAAGC    | 472           |
| AFE 3111                                                         | <i>petC1</i>    | GCCTCCTCCAAACTTGAGTC   | TTCCGGGAAAATTACTTGC    | 197           |
| <b>Sulfide-quinone reductase</b>                                 |                 |                        |                        |               |
| AFE 1792                                                         | <i>sqr</i>      | AGACCGGTTATATGATCGAA   | ATCATCTTGAACAGCACCTT   | 298           |
| <b>Thiosulfate-quinone oxidoreductase complex operon</b>         |                 |                        |                        |               |
| AFE 0043                                                         | <i>(doxD11)</i> | ATAGACAATCCGCAACTCAC   | ATGATGGTCAGATCATTGGT   | 302           |
| AFE 0045                                                         | <i>(doxD11)</i> | ATCAGAAACCCTTTCCCTAC   | GTCGGACACATGAGGATAAC   | 298           |
| AFE 0049                                                         | <i>(doxD11)</i> | CAAAGGTCTGGATTTACCA    | ACCGTGCTGAACGTAATAGT   | 310           |
| <b>Cytochrome <i>bd</i> ubiquinol oxidase</b>                    |                 |                        |                        |               |
| AFE 0955                                                         | <i>cydA</i>     | AAGTTTGTGCATACCTCCAT   | AGATTCTTCTGTTCGCTACG   | 307           |
| <b>Cytochrome <i>bo</i><sub>3</sub> ubiquinol oxidase</b>        |                 |                        |                        |               |
| AFE 0632                                                         | <i>cyoB</i>     | CAATTACATGGTCCACAACA   | AGCGTATACACCACGATACC   | 300           |
| <b>Heterodisulfide reductase complex operon</b>                  |                 |                        |                        |               |
| AFE 2553                                                         | <i>hdrA</i>     | AGGAAATTTCTCCGAGTACC   | GTGTTTTTCCAGACCGATAC   | 299           |
| AFE 2555                                                         | <i>hdrC</i>     | GAGATTGTGCAGTTGTTGTG   | CTCCACCTTCTGGATATTG    | 307           |
| AFE 2586                                                         | <i>hdrB</i>     | GGAGAAGGTCAAGAAGATCC   | TACCAGGTGGAGTAGTCGAT   | 303           |
| <b>Others</b>                                                    |                 |                        |                        |               |
| AFE 0282                                                         | <i>fur</i>      | TACGAGCGAATGATCGACG    | CACCATATGATCGTGGTGG    | 294           |
| AFE 0445                                                         | <i>galU</i>     | ATGGCTGAAGTGCGAAGGC    | ATGGTACTGACGTGGCTGGG   | 302           |
| AFE 0539                                                         | <i>cysN3</i>    | TCCGTGCTACAGGATATGC    | GATATTCGGGCGGAAATTCG   | 337           |
| AFE 1342                                                         | <i>epsS</i>     | GCAACAACGTGGCGAACAC    | AGGGGATCAGATGGCTCTC    | 306           |
| AFE 1663                                                         | <i>glcF</i>     | TTCCATCTGCTGGTACGAC    | AGTTGTGCGCTTCGTTGTG    | 295           |
| AFE 1677                                                         | <i>cbbO1a</i>   | ACGGCATTGAGCTATACCG    | TCCGGGTCTAGTAGTCAT     | 265           |

|          |                |                       |                       |     |
|----------|----------------|-----------------------|-----------------------|-----|
| AFE 2157 | <i>cbbOII</i>  | TATCTGAACACGCTACGCG   | ACAGGTCGAGTTTGCGTTC   | 295 |
| AFE 2324 | <i>pgm</i>     | GATCATGCACAGCATTGCCGC | TCAGGTGATGACAGTGGGG   | 352 |
| AFE 2599 | -              | GAGATTGTCCAGTCACAGAG  | CCTGCTCAAAGATCTGGTAG  | 262 |
| AFE 2602 | -              | AGATCAGGGAGCTACAAGCG  | TATCCTGACCGATTTCTCCG  | 245 |
| AFE 2836 | <i>glbB</i>    | CATTTCTCAGTTACGCGG    | TATAAGTGCCCCAGTCGCT   | 340 |
| AFE 2840 | <i>malQ</i>    | CGAAGATCTGCGTTATCGC   | TCGTTTTCATCTCGCTGTAGG | 297 |
| AFE 2971 | <i>cysN2</i>   | CTACGGTCCAGCAGATATTC  | GCGATATCGTTCATCTGTAGC | 322 |
| AFE 3054 | <i>cbbOIIb</i> | CAGCGGTGACTTTGAAGATC  | ATGAAAAGGCAGCCAGATGG  | 286 |
| AFE 3116 | -              | CCGCCATATATTTGGCAGAG  | CCTGCTCAAAGATCTGGTAG  | 262 |
| AFE 3119 | -              | CGGAAAACATCCGAGCCTC   | TATCCTGACCGATTTCTCCG  | 198 |
| AFE 3124 | <i>cysD</i>    | CTAGCAATCACCATCTGGAC  | CATTACGCGAATCGCTTGC   | 327 |
